# Supplementary material
Source: PubMed Central journal article supplement (PMC2343590)
Supplement: blood_blood-2007-09-110569_1.pdf [file blood_blood-2007-09-110569_1.pdf]

|                                             |                                                           |                                                    |
|---------------------------------------------|-----------------------------------------------------------|----------------------------------------------------|
|                                             | Absent or strongly reduced<br><i>pu.1</i> Expression, %   |                                                    |
| wt (n>20)                                   | 0                                                         |                                                    |
| <i>etsrp</i> MO (n=52)                      | 95                                                        |                                                    |
| <i>etsrp</i> MO + <i>scl</i> RNA (n=17)     | 0                                                         |                                                    |
| <i>scl</i> RNA (n=16)                       | 0                                                         |                                                    |
|                                             | Absent or strongly reduced<br><i>flk1</i> expression, %   | Increased <i>flk1</i> expression,<br>%             |
| wt (n>20)                                   | 0                                                         | 0                                                  |
| <i>etsrp</i> MO (n>50)                      | 100                                                       | 0                                                  |
| <i>etsrp</i> MO + <i>scl</i> RNA (n=20)     | 100                                                       | 0                                                  |
| <i>scl</i> RNA (n=17)                       | 0                                                         | 71                                                 |
|                                             | Absent or strongly reduced<br><i>pu.1</i> expression, %   | Increased / ectopic <i>pu.1</i><br>expression, %   |
| wt (n=40)                                   | 0                                                         | 0                                                  |
| <i>scl</i> MO (n=38)                        | 92                                                        | 0                                                  |
| <i>etsrp</i> RNA (n=29)                     | 10                                                        | 48                                                 |
| <i>scl</i> MO + <i>etsrp</i> RNA (n=40)     | 95                                                        | 0                                                  |
|                                             | Absent or strongly reduced<br><i>pu.1</i> expression, %   | Increased / ectopic <i>pu.1</i><br>expression, %   |
| wt (n>40)                                   | 0                                                         | 0                                                  |
| <i>alk8</i> MO (n=25)                       | 100                                                       | 0                                                  |
| <i>etsrp</i> RNA (n=31)                     | 0                                                         | 82                                                 |
| <i>alk8</i> MO + <i>etsrp</i> RNA<br>(n=33) | 100                                                       | 0                                                  |
|                                             | Some / moderate number of<br>ectopic <i>pu.1</i> cells, % | Dramatic increase in <i>pu.1</i><br>cell number, % |
| wt (n=40)                                   | 0                                                         | 0                                                  |
| <i>alk8</i> RNA (n=40)                      | 0                                                         | 0                                                  |
| <i>etsrp</i> RNA (n=51)                     | 59                                                        | 4                                                  |
| <i>alk8</i> + <i>etsrp</i> RNA (n=67)       | 55                                                        | 21                                                 |
